# Supplementary material for: De-Regulated MicroRNAs in Pediatric Cancer Stem Cells Target Pathways Involved in Cell Proliferation, Cell Cycle and Development
Source: PLOS journal article supplement (doi:10.1371/journal.pone.0061622), 2013-04-17
Supplement: S1 (10.1371/journal.pone.0061622.s001) [file journal.pone.0061622.s001]

Supplemental Data

**De-regulated microRNAs in pediatric cancer stem cells target pathways involved in cell proliferation, cell cycle and development**

Patricia C. Sanchez Diaz, Tzu-Hung Hsiao, Judy C. Chang, Dong Yue, Mimi C. Tan, Harry Hung-I Chen, Gail E. Tomlinson, Yufei Huang, Yidong Chen, and Jaclyn Y. Hung

**Table S1.** Cell cycle and cell proliferation related genes in the cancers. (✓ indicates the gene is in the gene set named in the column header).

|               | CHRONIC<br>MYELOID<br>LEUKEMIA | GLIOMA | MELANOMA | PANCREATIC<br>CANCER | PROSTATE<br>CANCER | SMALL<br>CELL<br>LUNG<br>CANCER |
|---------------|--------------------------------|--------|----------|----------------------|--------------------|---------------------------------|
| <b>CDKN1A</b> | ✓                              | ✓      | ✓        | ✓                    | ✓                  |                                 |
| <b>CDKN1B</b> | ✓                              |        |          | ✓                    | ✓                  | ✓                               |
| <b>E2F1</b>   | ✓                              |        | ✓        | ✓                    | ✓                  | ✓                               |
| <b>RB1</b>    | ✓                              | ✓      | ✓        | ✓                    | ✓                  | ✓                               |
| <b>PTEN</b>   |                                | ✓      | ✓        |                      | ✓                  | ✓                               |

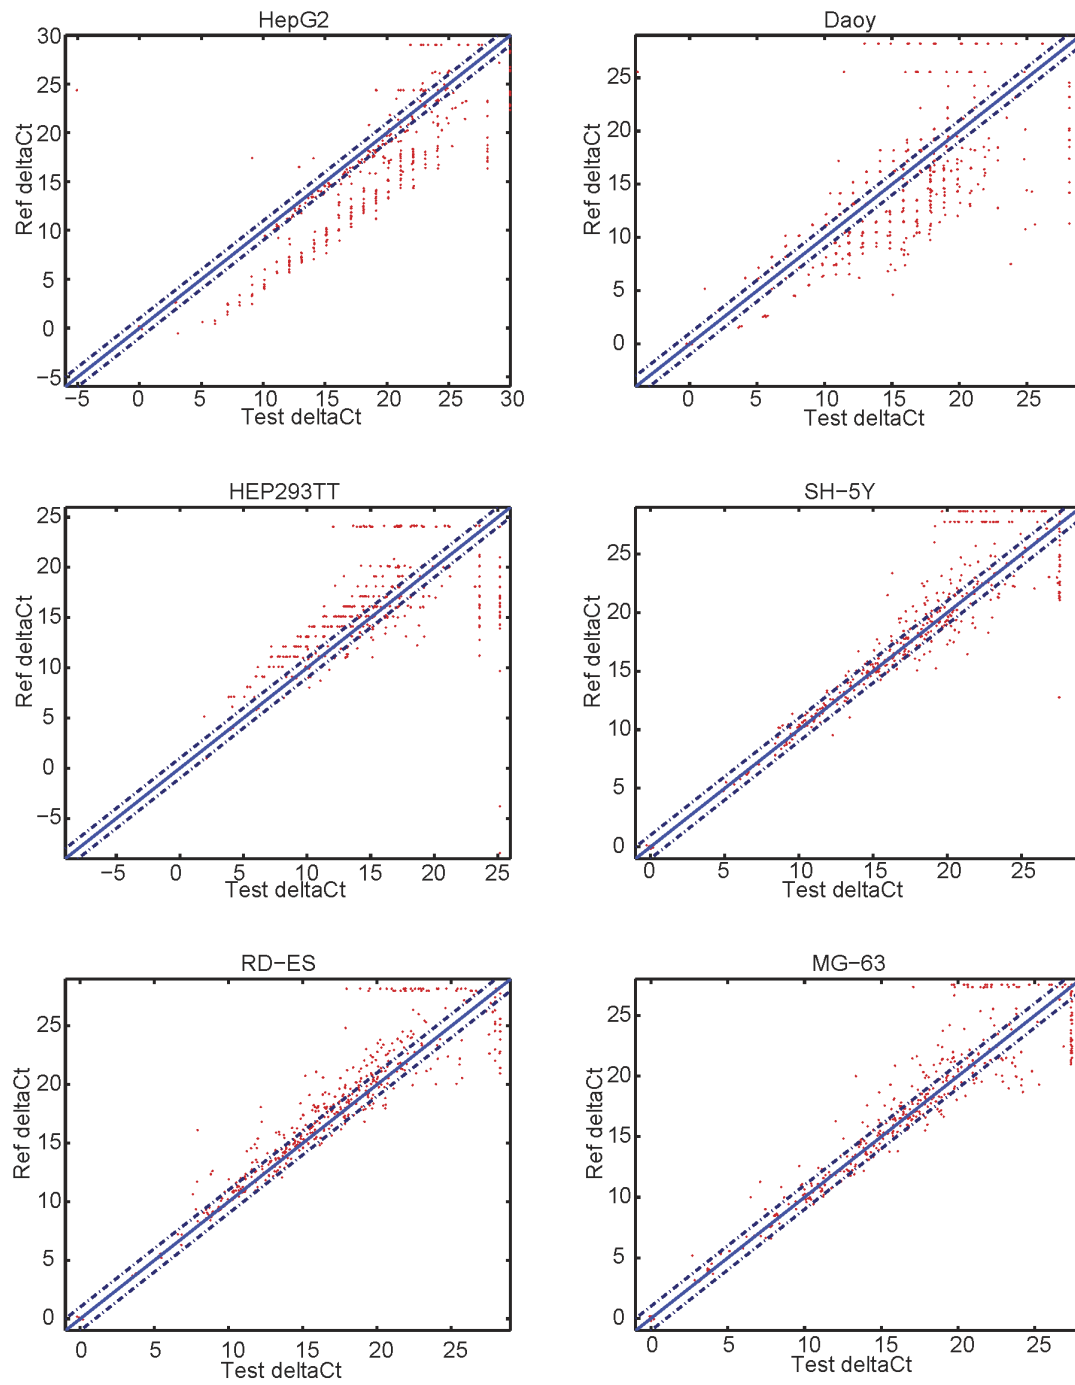

**Figure S1.** The scatter plots of raw  $\Delta Ct$  of 6 cell lines between test (enriched CSC miRNAs) and reference (non-enriched counterpart) samples before normalization.

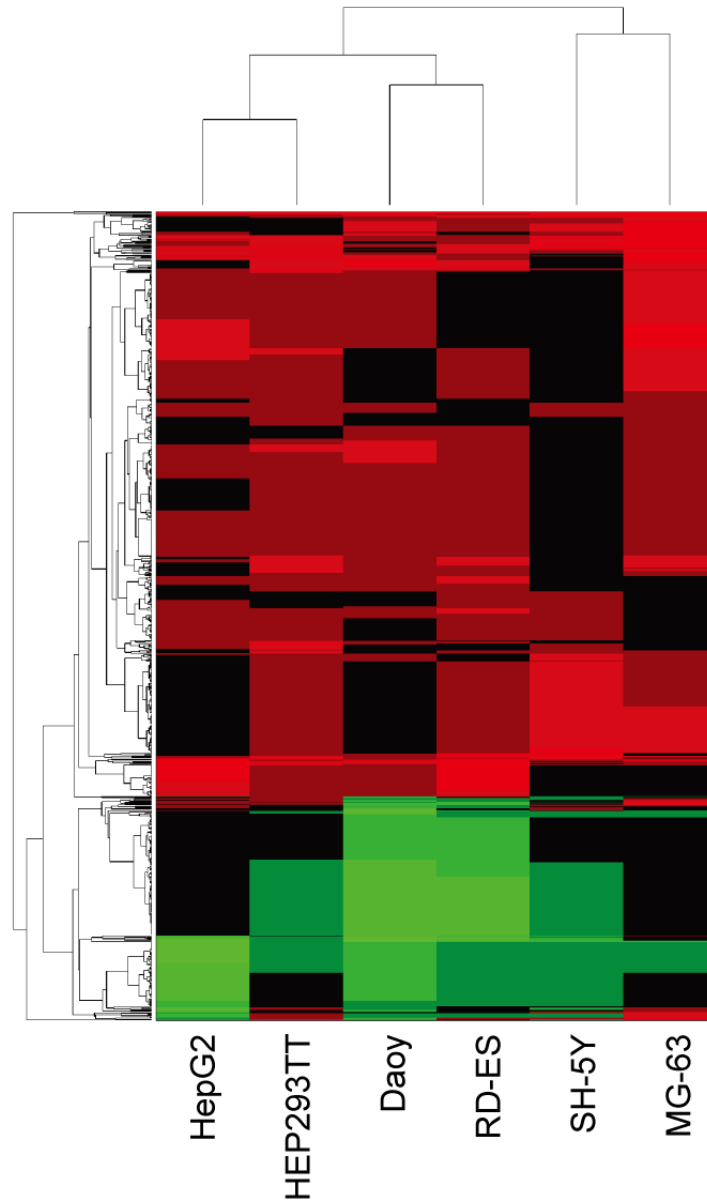

**Figure S2.** The heatmap of 865 putative microRNA target genes. 630 of 865 putative microRNA target genes were up-regulated and 235 were down regulated. The 863 target genes' value were computed by  $\mathbf{B}\Delta x_j$  (see Eq. 2, Materials and Methods Section for details).

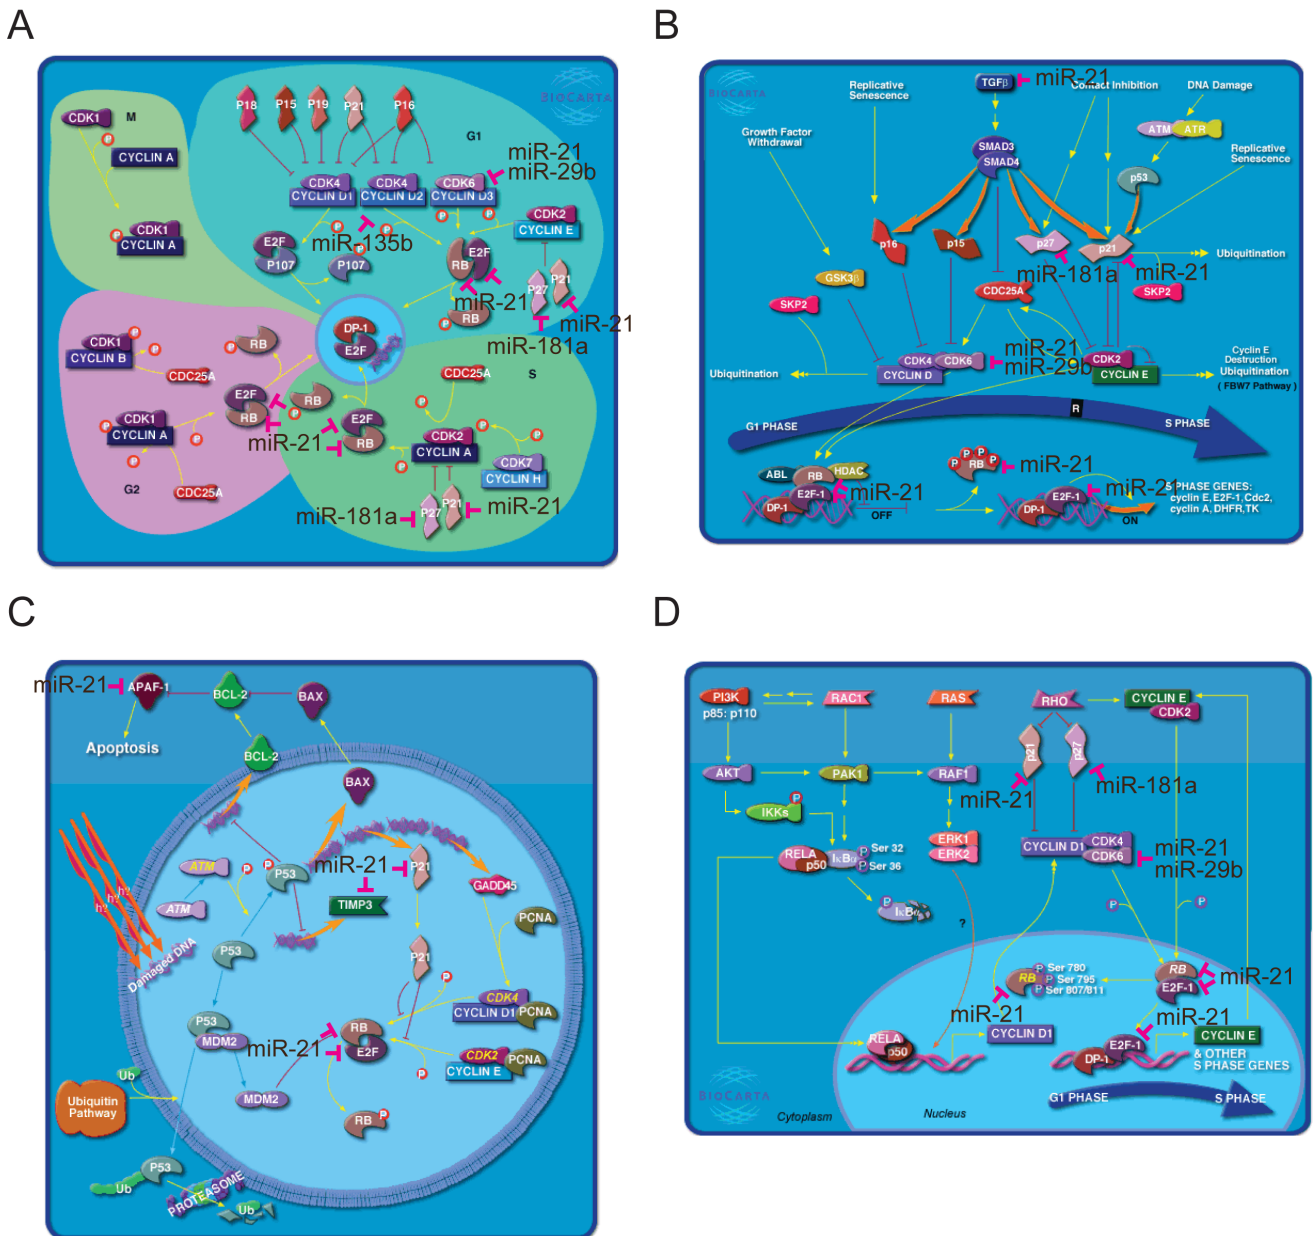

**Figure S3-1.** The CSC associated Biocarta pathways regulated by miRNAs identified in Figure 1B. A) CELLCYCLE, 2) G1, 3) P53, and 4) RACCYCD pathway.

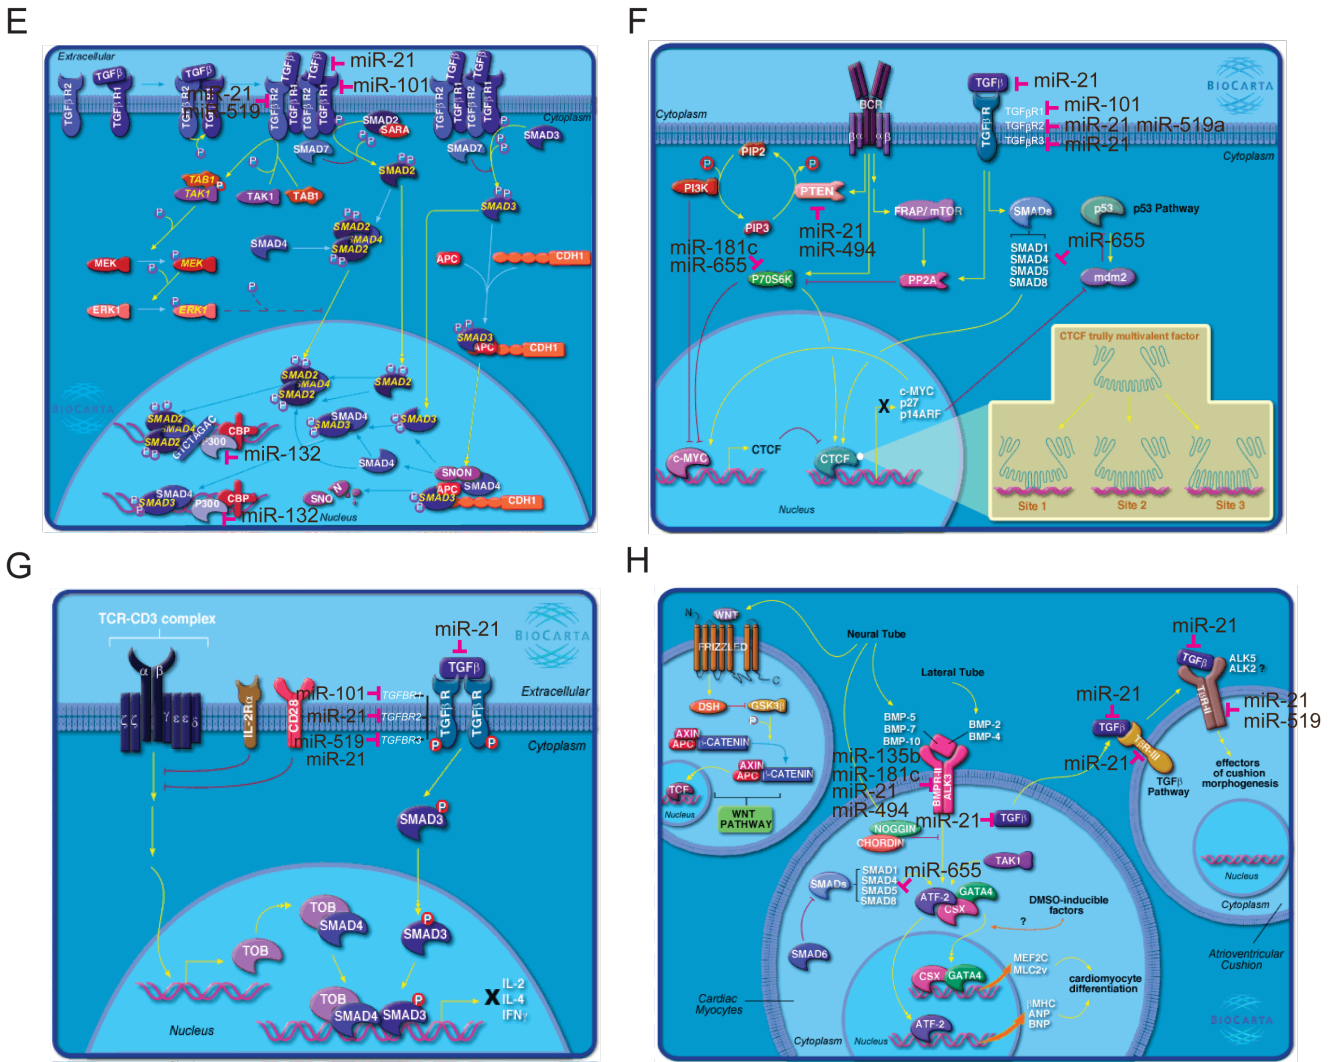

**Figure S3-2.** The CSC associated Biocarta pathways regulated by miRNAs identified in Figure 1B. E) CTCF, F) TOB1, G) ALK, and H) PTEN pathway.
